# Supplementary material for: Complementary interpretation of ET(30) polarity parameters of ionic liquids
Source: Royal Society of Chemistry journal article supplement (doi:10.1039/d0cp01480j), 2020-01-01
Supplement: d0cp01480j1.pdf [file d0cp01480j1.pdf]

## Electronic Supplementary Information

for

# Complementary Interpretation of $E_T(30)$ Polarity Parameters of Ionic Liquids

Stefan Spange,<sup>a</sup> Caroline Lienert,<sup>a</sup> Nadine Friebe<sup>a</sup> and Katja Schreiter<sup>a</sup>

<sup>a</sup> Chemnitz University of Technology, Straße der Nationen 62, 09111 Chemnitz, Germany.  
Corresponding author e-mail address: [stefan.spange@chemie.tu-chemnitz.de](mailto:stefan.spange@chemie.tu-chemnitz.de)

### Content.

**Task A:** Effect of the ILs anion on the  $E_T(30)$  parameter

- UV/vis and <sup>1</sup>H-NMR spectroscopic investigations of [C<sub>2</sub>mim]FAP using TEA

**Task B:** Investigation of protic ionic liquids

- UV/vis absorption spectra of selected solvatochromic dyes in EtNH<sub>3</sub>NO<sub>3</sub>
- UV/vis absorption spectra of selected solvatochromic dyes in HO-[C<sub>2</sub>mim]NTf<sub>2</sub>
- UV/vis absorption spectra of selected solvatochromic dyes in HO-[C<sub>2</sub>mim]BF<sub>4</sub>
- UV/vis absorption spectra of Reichardt's dye **1** in various protic ILs with different amounts of added TEA

**Task C:** Correlation of  $E_T(30)$  as function of the Kamlet-Taft as well as Catalán solvent parameters of ionic liquids

- Correlation analyses of  $E_T(30)$  with  $SA$  and  $SdP$
- Correlation analyses of  $E_T(30)$  with  $SA$ ,  $SB$  and  $SdP$
- Evaluation of Catalán solvent parameter  $SdP$  of ILs regarding their correlation with molar volume properties
- Correlation of  $E_T(30)$  and  $SA$  with molar concentration of the IL

## Task A: Effect of the ILs anion on the $E_T(30)$ parameter

### 1. UV/vis and $^1\text{H-NMR}$ spectroscopic investigations of $[\text{C}_2\text{mim}]\text{FAP}$ using TEA

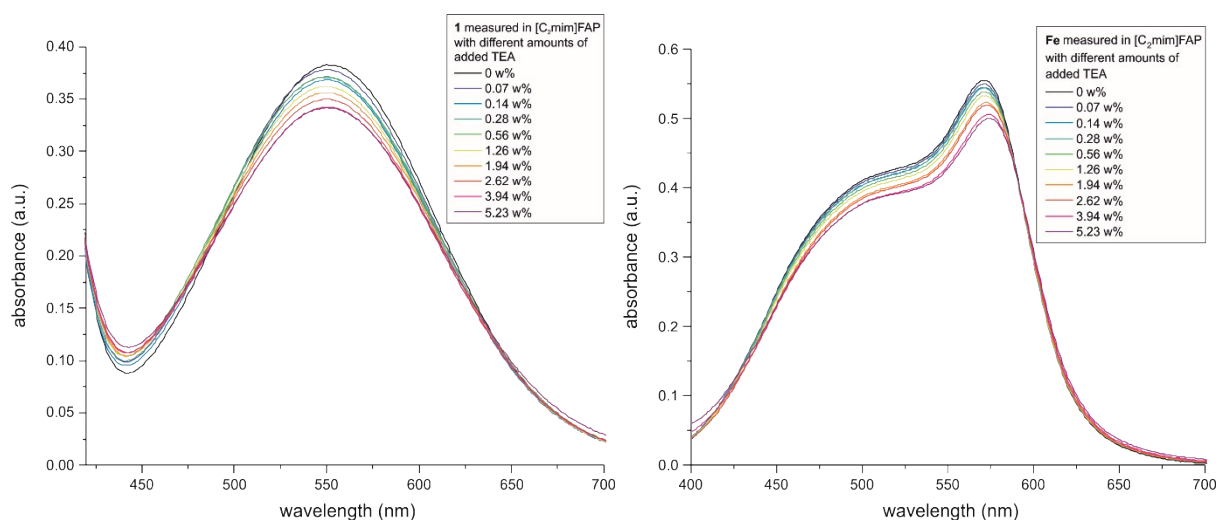

**Figure S1.** Left: UV/vis spectra of Reichardt's dye 1 in  $[\text{C}_2\text{mim}]\text{FAP}$  with different amounts of added TEA, Right: UV/vis spectra of Fe in  $[\text{C}_2\text{mim}]\text{FAP}$  with different amounts of added TEA.

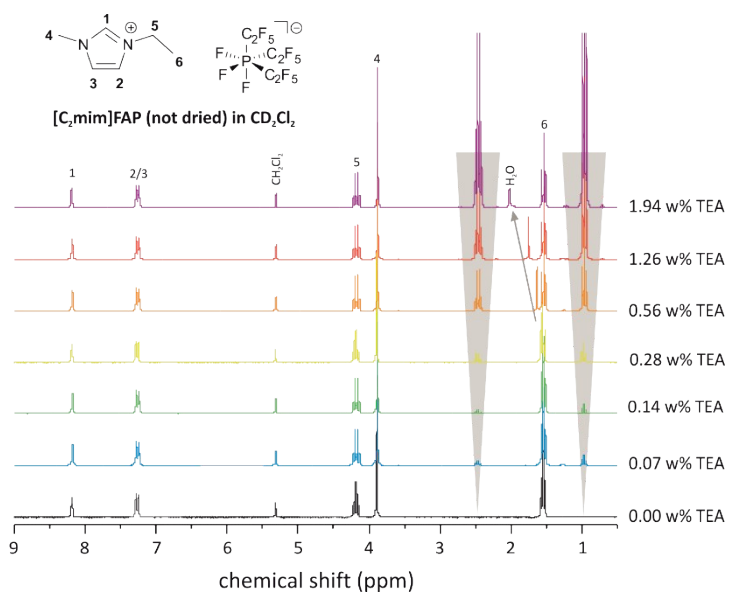

**Figure S2.**  $^1\text{H-NMR}$  spectrum of undried  $[\text{C}_2\text{mim}]\text{FAP}$  in  $\text{CD}_2\text{Cl}_2$  with addition of up to 1.94 w% TEA. Signals from TEA are grey shaded, water peaks are marked with a grey arrow.

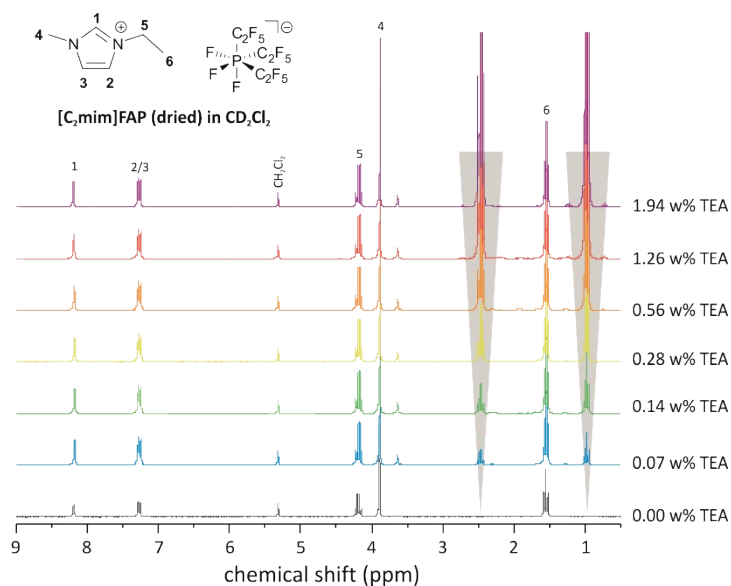

**Figure S3.**  $^1\text{H-NMR}$  spectrum of dried  $[\text{C}_2\text{mim}]\text{FAP}$  in  $\text{CD}_2\text{Cl}_2$  with addition of up to 1.94 w% TEA. Signals from TEA are grey shaded.

### Task B: Investigation of protic ionic liquids

**Table S1.** UV/vis absorption maxima of Reichardt's dye **1**, **Fe**, **ABF**, **DMe-ABF**, **Th**, **DENA** and **BMN** in protic ionic liquids.

| IL                                             | <b>1</b>                       |                                                               | <b>Fe</b>                      |                                                               | <b>ABF</b>                     |                                                               | <b>DMe-ABF</b>                 |                                                               | <b>Th</b>                      |                                                               | <b>DENA</b>                    |                                                               | <b>BMN</b>                     |                                                               |
|------------------------------------------------|--------------------------------|---------------------------------------------------------------|--------------------------------|---------------------------------------------------------------|--------------------------------|---------------------------------------------------------------|--------------------------------|---------------------------------------------------------------|--------------------------------|---------------------------------------------------------------|--------------------------------|---------------------------------------------------------------|--------------------------------|---------------------------------------------------------------|
|                                                | $\lambda_{\text{max}}$<br>(nm) | $\tilde{\nu}_{\text{max}} \cdot 10^3$<br>( $\text{cm}^{-1}$ ) |
| $\text{EtNH}_3\text{NO}_3$                     | 461                            | 21.7                                                          | 538                            | 18.6                                                          | 606                            | 16.5                                                          | 633                            | 15.8                                                          | 637                            | 15.7                                                          | 418                            | 23.9                                                          | 441                            | 22.7                                                          |
| $\text{HO-}[\text{C}_2\text{mim}]\text{NTf}_2$ | 471                            | 21.2                                                          | 545                            | 18.3                                                          | 577                            | 17.3                                                          | 645                            | 15.5                                                          | 628                            | 15.9                                                          | 416                            | 24.0                                                          | 436                            | 22.9                                                          |
| $\text{HO-}[\text{C}_2\text{mim}]\text{BF}_4$  | 459                            | 21.8                                                          | 544                            | 18.4                                                          | 592                            | 16.9                                                          | 635                            | 15.7                                                          | 633                            | 15.8                                                          | 417                            | 23.9                                                          | 438                            | 22.8                                                          |

## 1. UV/vis absorption spectra of selected solvatochromic dyes in EtNH<sub>3</sub>NO<sub>3</sub>

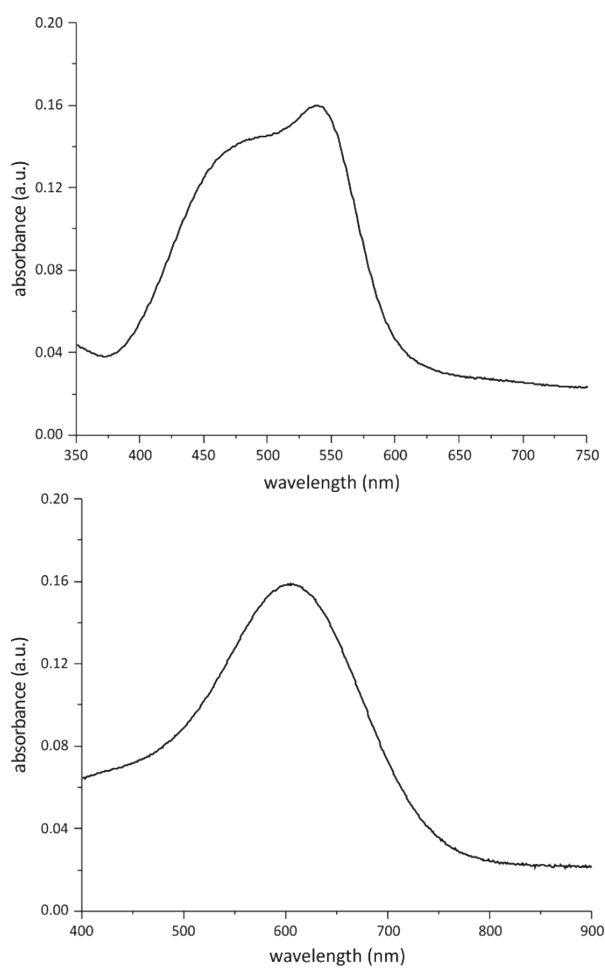

**Figure S4.** Left: UV/vis absorption spectrum of **Fe** measured in EtNH<sub>3</sub>NO<sub>3</sub>, Right: UV/vis absorption spectrum of **ABF** measured in EtNH<sub>3</sub>NO<sub>3</sub>.

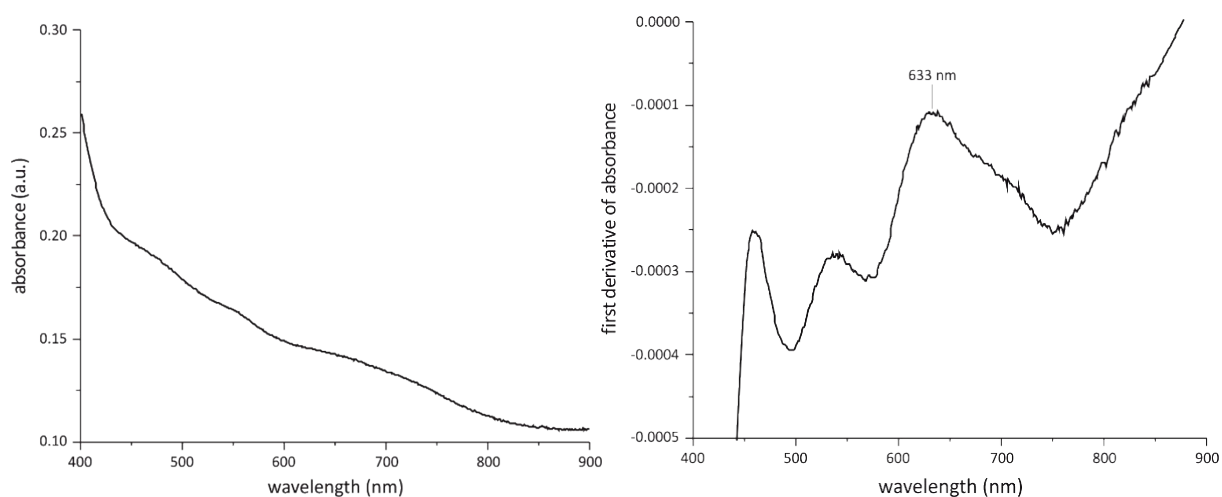

**Figure S5.** Left: UV/vis absorption spectrum of **DMe-ABF** measured in EtNH<sub>3</sub>NO<sub>3</sub>, Right: first derivation of this UV/vis absorption spectrum.

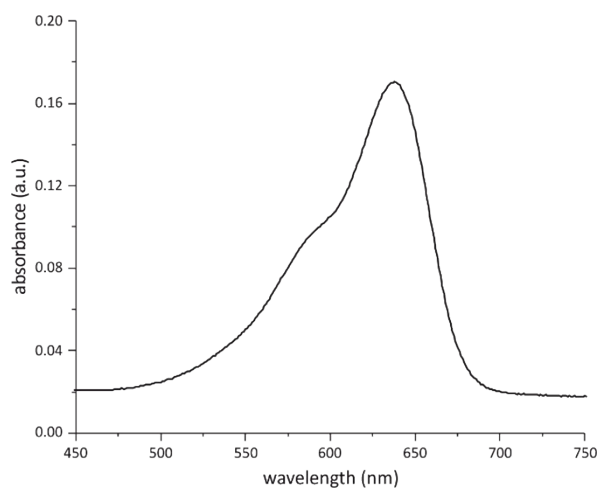

**Figure S6.** UV/vis absorption spectrum of **Th** measured in  $\text{EtNH}_3\text{NO}_3$ .

## 2. UV/vis absorption spectra of selected solvatochromic dyes in $\text{HO}[\text{C}_2\text{mim}]\text{NTf}_2$

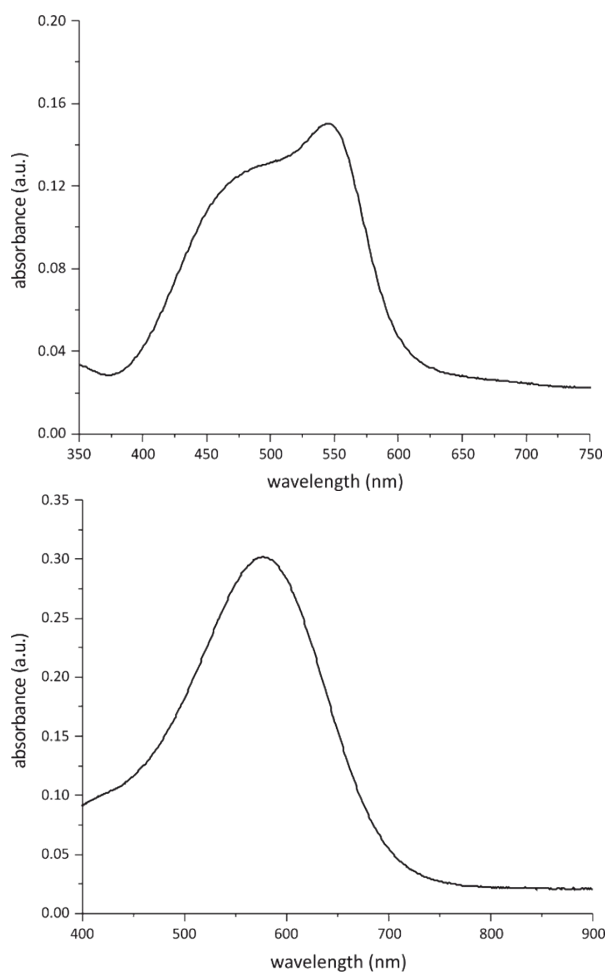

**Figure S7.** Left: UV/vis absorption spectrum of **Fe** measured in  $\text{HO}[\text{C}_2\text{mim}]\text{NTf}_2$ , Right: UV/vis absorption spectrum of **ABF** measured in  $\text{HO}[\text{C}_2\text{mim}]\text{NTf}_2$ .

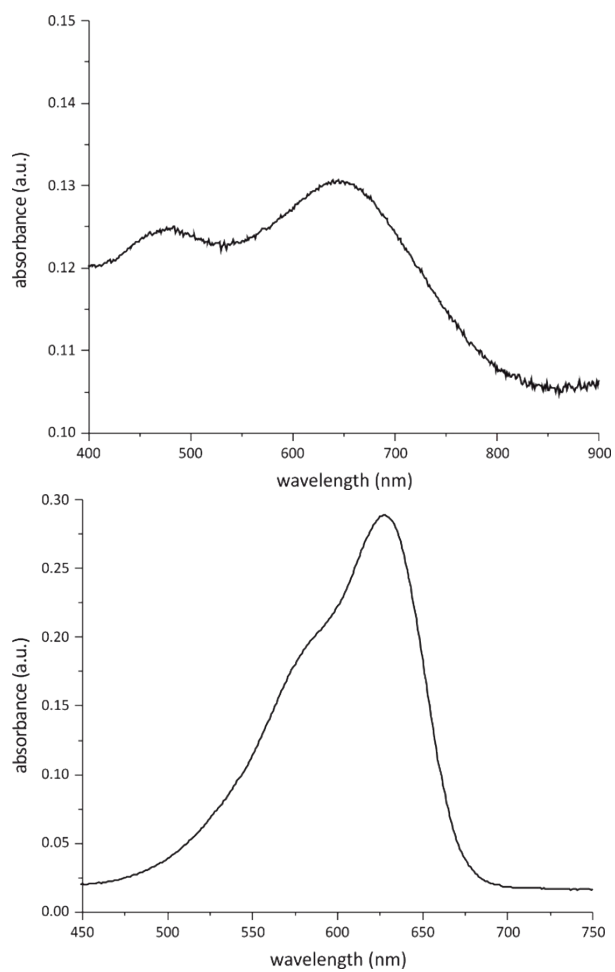

**Figure S8.** Left: UV/vis absorption spectrum of **DMe-ABF** measured in HO-[C<sub>2</sub>mim]NTf<sub>2</sub>, Right: UV/vis absorption spectrum of **Th** measured in HO-[C<sub>2</sub>mim]NTf<sub>2</sub>.

### 3. UV/vis absorption spectra of selected solvatochromic dyes in HO-[C<sub>2</sub>mim]BF<sub>4</sub>

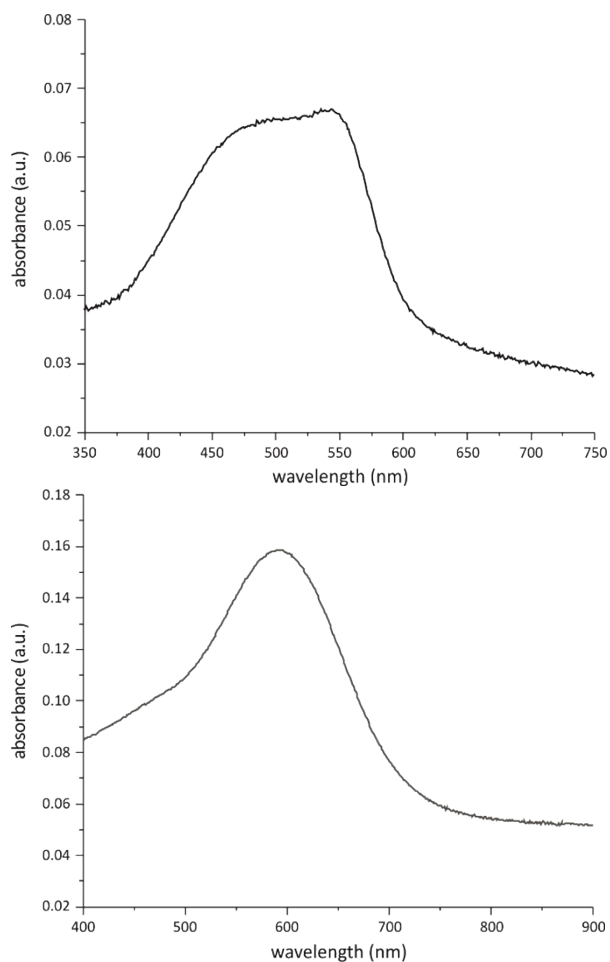

**Figure S9.** Left: UV/vis absorption spectrum of **Fe** measured in HO-[C<sub>2</sub>mim]BF<sub>4</sub>, Right: UV/vis absorption spectrum of **ABF** measured in HO-[C<sub>2</sub>mim]BF<sub>4</sub>.

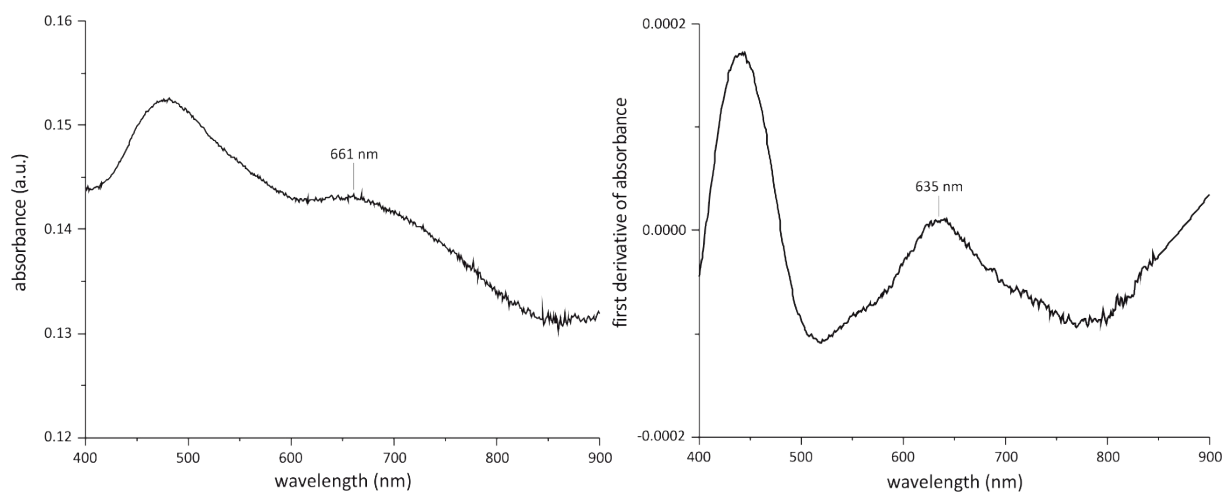

**Figure S10.** Left: UV/vis absorption spectrum of **DMe-ABF** measured in HO-[C<sub>2</sub>mim]BF<sub>4</sub>, Right: first derivation of this UV/vis absorption spectrum.

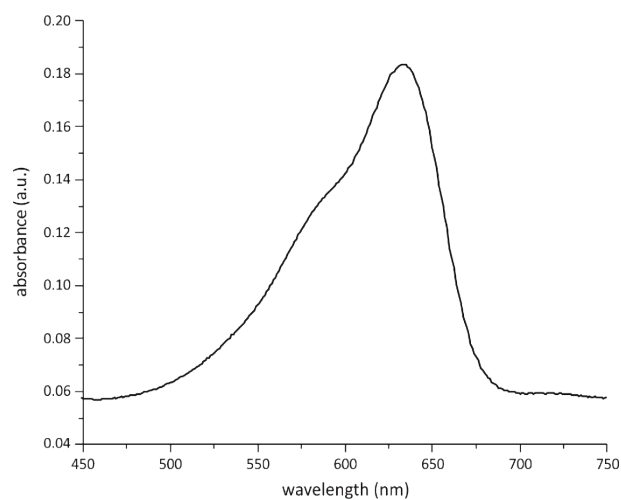

**Figure S11.** UV/vis absorption spectrum of **Th** measured in HO-[C<sub>2</sub>mim]BF<sub>4</sub>.

**4. UV/vis absorption spectra of Reichardt's dye **1** in various protic ILs with different amounts of added TEA**

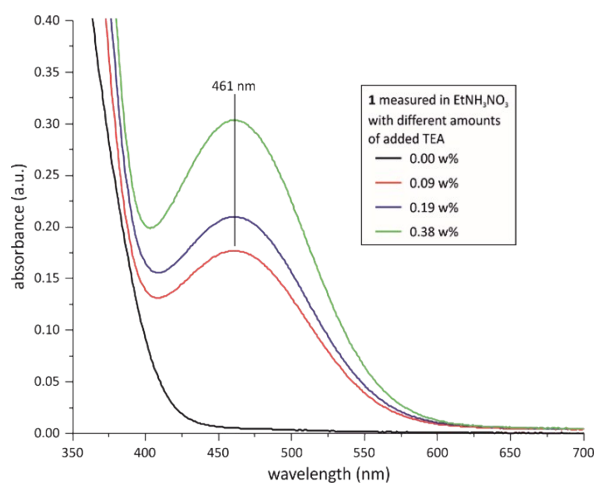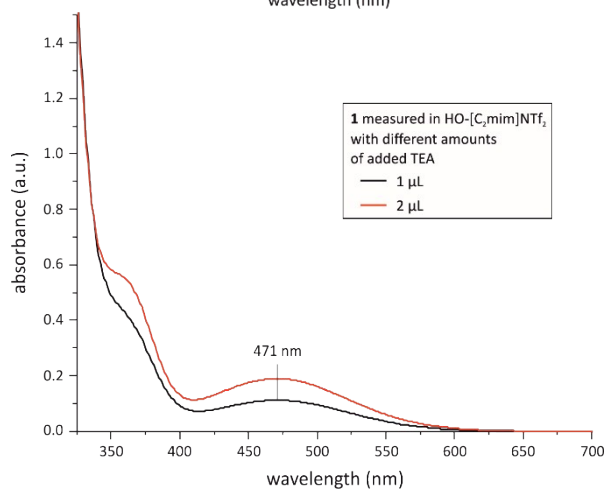

**Figure S12.** Left: UV/vis spectra of Reichardt's dye (**1**) in EtNH<sub>3</sub>NO<sub>3</sub> with different amounts of added TEA, Right: UV/vis spectra of Reichardt's dye (**1**) in HO-[C<sub>2</sub>mim]NTf<sub>2</sub> with different amounts of added TEA.



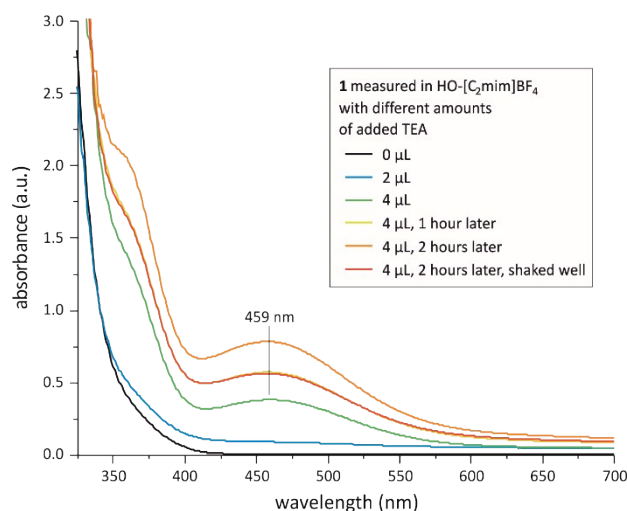

Figure S13. UV/vis spectra of Reichardt's dye (1) in HO-[C<sub>2</sub>mim]BF<sub>4</sub> with different amounts of added TEA.

### Task C: Correlation of $E_T(30)$ as function of the Kamlet-Taft as well as Catalán solvent parameters of ionic liquids

Table S2. Kamlet-Taft parameters, Catalán parameters and  $E_T(30)$  values used for correlation analyses.

| IL                                                  | $\alpha$ (Fe) <sup>2</sup> | $\beta$ (ABF) <sup>2</sup> | $\pi^*$ (Th) <sup>2</sup> | SA (Fe) <sup>1</sup> | SB (ABF, DMe-ABF) <sup>1</sup> | SP (Th, BMN) <sup>1</sup> | SdP (Th, BMN) <sup>1</sup> | $E_T(30)$          |
|-----------------------------------------------------|----------------------------|----------------------------|---------------------------|----------------------|--------------------------------|---------------------------|----------------------------|--------------------|
| [C <sub>1</sub> mim]NTf <sub>2</sub>                | 0.60                       | 0.36                       | 0.80                      | —                    | —                              | —                         | —                          | 52.6 <sup>6</sup>  |
| [C <sub>2</sub> mim]N(CN) <sub>2</sub>              | 0.51                       | 0.61                       | 0.98                      | —                    | —                              | —                         | —                          | 51.7 <sup>10</sup> |
| [C <sub>2</sub> mim]FAP                             | 0.62 <sup>a</sup>          | 0.20                       | 0.71                      | 0.346 <sup>a</sup>   | 0.191                          | 0.755                     | 0.756                      | 51.6 <sup>a</sup>  |
| [C <sub>4</sub> mim]Cl                              | 0.32                       | 0.95                       | 1.13                      | 0.167                | 0.869                          | 0.833                     | 1.172                      | 51.0 <sup>3</sup>  |
| [C <sub>4</sub> mim]Ac                              | 0.36                       | 0.85                       | 1.06                      | —                    | —                              | —                         | —                          | 48.8 <sup>4</sup>  |
| [C <sub>4</sub> mim]MeSO <sub>3</sub>               | 0.36                       | 0.85                       | 1.04                      | 0.191                | 0.799                          | 0.837                     | 1.062                      | 49.6 <sup>4</sup>  |
| [C <sub>4</sub> mim]OctOSO <sub>3</sub>             | 0.41                       | 0.77                       | 0.96                      | 0.223                | 0.691                          | 0.769                     | 1.032                      | 51.9 <sup>5</sup>  |
| [C <sub>4</sub> mim]MeOSO <sub>3</sub>              | 0.39                       | 0.75                       | 1.05                      | —                    | —                              | —                         | —                          | 51.4 <sup>4</sup>  |
| [C <sub>4</sub> mim]CF <sub>3</sub> CO <sub>2</sub> | 0.43                       | 0.74                       | 0.90                      | —                    | —                              | —                         | —                          | 51.1 <sup>6</sup>  |
| [C <sub>4</sub> mim]NO <sub>3</sub>                 | 0.40                       | 0.74                       | 1.04                      | 0.215                | 0.664                          | 0.868                     | 1.034                      | 51.8 <sup>7</sup>  |
| [C <sub>4</sub> mim]N(CN) <sub>2</sub>              | 0.44                       | 0.64                       | 0.98                      | —                    | —                              | —                         | —                          | 51.5 <sup>4</sup>  |
| [C <sub>4</sub> mim]CF <sub>3</sub> SO <sub>3</sub> | 0.50                       | 0.57                       | 0.90                      | 0.271                | 0.482                          | 0.808                     | 0.934                      | 52.1 <sup>4</sup>  |
| [C <sub>4</sub> mim]ClO <sub>4</sub>                | 0.50                       | 0.55                       | 0.98                      | 0.271                | 0.397                          | 0.844                     | 0.994                      | 52.9 <sup>8</sup>  |
| [C <sub>4</sub> mim]BF <sub>4</sub>                 | 0.52                       | 0.55                       | 0.96                      | 0.288                | 0.466                          | 0.800                     | 1.003                      | 52.4 <sup>6</sup>  |
| [C <sub>4</sub> mim]PF <sub>6</sub>                 | 0.54                       | 0.44                       | 0.90                      | 0.296                | 0.364                          | 0.808                     | 0.934                      | 52.6 <sup>9</sup>  |
| [C <sub>4</sub> mim]NTf <sub>2</sub>                | 0.55                       | 0.42                       | 0.83                      | 0.304                | 0.372                          | 0.793                     | 0.867                      | 51.7 <sup>6</sup>  |
| [C <sub>4</sub> mim]SbF <sub>6</sub>                | 0.58                       | 0.42                       | 0.87                      | —                    | —                              | —                         | —                          | 52.1 <sup>9</sup>  |
| [C <sub>4</sub> mim]FAP                             | 0.59                       | 0.25                       | 0.78                      | 0.329                | 0.233                          | 0.747                     | 0.829                      | 51.5 <sup>a</sup>  |
| [C <sub>6</sub> mim]Cl                              | 0.31                       | 0.97                       | 1.06                      | 0.159                | 0.996                          | 0.787                     | 1.139                      | 50.2 <sup>5</sup>  |
| [C <sub>6</sub> mim]Br                              | 0.36                       | 0.88                       | 1.09                      | 0.191                | 0.786                          | 0.861                     | 1.101                      | 50.6 <sup>5</sup>  |
| [C <sub>6</sub> mim]N(CN) <sub>2</sub>              | 0.44                       | 0.69                       | 1.00                      | 0.239                | 0.596                          | 0.866                     | 0.990                      | 51.0 <sup>5</sup>  |
| [C <sub>6</sub> mim]CF <sub>3</sub> SO <sub>3</sub> | 0.47                       | 0.61                       | 0.92                      | 0.255                | 0.515                          | 0.798                     | 0.959                      | 52.7 <sup>11</sup> |
| [C <sub>6</sub> mim]BF <sub>4</sub>                 | 0.44                       | 0.60                       | 0.96                      | 0.239                | 0.495                          | 0.800                     | 1.003                      | 53.6 <sup>9</sup>  |
| [C <sub>6</sub> mim]PF <sub>6</sub>                 | 0.51                       | 0.50                       | 0.93                      | 0.279                | 0.463                          | 0.820                     | 0.954                      | 52.3 <sup>12</sup> |
| [C <sub>6</sub> mim]NTf <sub>2</sub>                | 0.51                       | 0.44                       | 0.86                      | —                    | —                              | —                         | —                          | 51.7 <sup>6</sup>  |
| [C <sub>8</sub> mim]Cl                              | 0.31                       | 0.98                       | 1.03                      | 0.159                | 1.001                          | 0.784                     | 1.096                      | 48.5 <sup>12</sup> |
| [C <sub>8</sub> mim]BF <sub>4</sub>                 | 0.45                       | 0.63                       | 0.93                      | 0.247                | 0.525                          | 0.788                     | 0.983                      | 51.9 <sup>5</sup>  |
| [C <sub>8</sub> mim]PF <sub>6</sub>                 | 0.52                       | 0.53                       | 0.92                      | 0.288                | 0.392                          | 0.798                     | 0.959                      | 50.1 <sup>12</sup> |
| [C <sub>8</sub> mim]NTf <sub>2</sub>                | 0.48                       | 0.47                       | 0.86                      | 0.263                | 0.373                          | 0.774                     | 0.918                      | 51.4 <sup>11</sup> |
| [C <sub>10</sub> mim]NTf <sub>2</sub>               | 0.48                       | 0.49                       | 0.86                      | 0.263                | 0.396                          | 0.774                     | 0.918                      | 51.0 <sup>13</sup> |
| [3C <sub>6</sub> C <sub>14</sub> P]NTf <sub>2</sub> | 0.36                       | 0.58                       | 0.87                      | 0.191                | 0.447                          | 0.827                     | 0.884                      | 46.4 <sup>14</sup> |
| [C <sub>4</sub> mPip]NTf <sub>2</sub>               | 0.43                       | 0.42                       | 0.82                      | —                    | —                              | —                         | —                          | 49.4 <sup>15</sup> |
| [C <sub>4</sub> Py]NTf <sub>2</sub>                 | 0.51                       | 0.42                       | 0.85                      | 0.279                | 0.339                          | 0.815                     | 0.863                      | 48.7 <sup>17</sup> |
| [C <sub>6</sub> Py]NTf <sub>2</sub>                 | 0.50                       | 0.44                       | 0.86                      | 0.271                | 0.379                          | 0.805                     | 0.888                      | 50.1 <sup>16</sup> |
| [C <sub>4</sub> dmim]BF <sub>4</sub>                | 0.41                       | 0.57                       | 1.00                      | 0.215                | 0.452                          | 0.834                     | 1.019                      | 49.7 <sup>9</sup>  |
| [C <sub>4</sub> dmim]NTf <sub>2</sub>               | 0.44                       | 0.44                       | 0.86                      | 0.239                | 0.371                          | 0.774                     | 0.918                      | 50.1 <sup>6</sup>  |

|                 |      |      |      |       |       |       |       |                    |
|-----------------|------|------|------|-------|-------|-------|-------|--------------------|
| $[3C_8mN]NTf_2$ | 0.39 | 0.55 | 0.87 | 0.207 | 0.396 | 0.827 | 0.884 | 46.2 <sup>14</sup> |
|-----------------|------|------|------|-------|-------|-------|-------|--------------------|

<sup>a</sup> Data was determined experimentally.

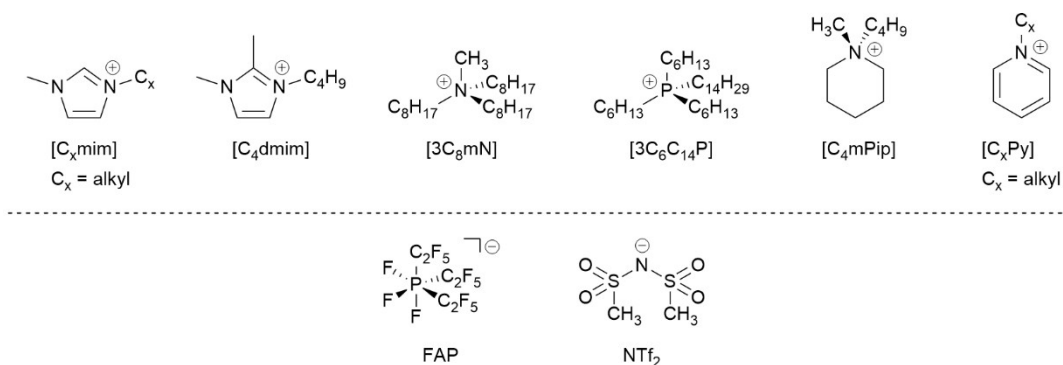

**Scheme S1.** Cations used within this study and the corresponding abbreviations. Anions are given as chemical formulas, except for FAP and NTf<sub>2</sub>.

### 1. Correlation analyses of $E_T(30)$ with SA and SdP

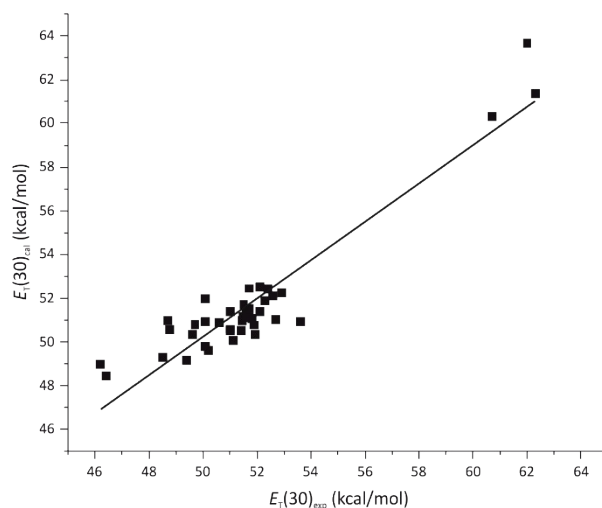

**Figure S14.** Correlation of the *via* eq. 7 (main text) calculated  $E_T(30)$  parameter of ILs versus the measured value as function (data for correlation analyses are taken from Table S2).

### 2. Correlation analyses of $E_T(30)$ with SA, SB and SdP

$E_T(30)$  was correlated with SA, SB and SdP. A smaller significance ( $F = 96$ , eq. S1) compared to the correlation with SA and SdP ( $F = 125$ , eq. 9) was obtained.

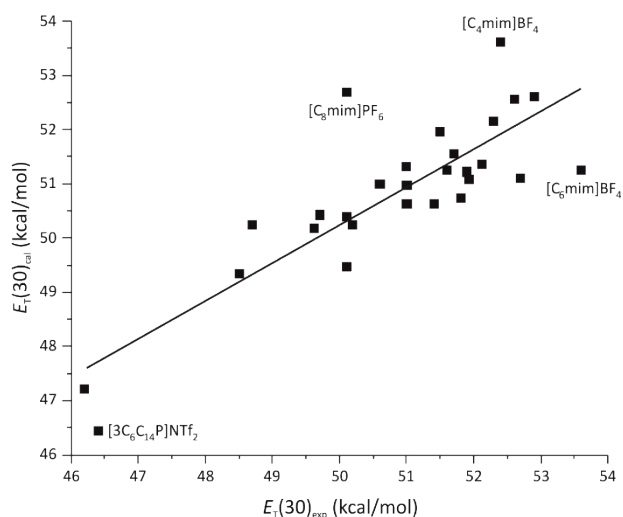

**Figure S15.** Correlation of the calculated  $E_T(30)$  parameter of ILs *via* eq. S1 *versus* the measured value (data for correlation analyses are taken from Table S2).

$$E_T(30) = 48.32 SA + 0.016 SB + 20.92 SdP + 18.71 \quad (S1)$$

$n = 28, r = 0.812, f = 2.00 \cdot 10^{-6}$

### 3. Evaluation of Catalán solvent parameter $SdP$ of ILs regarding their correlation with molar volume properties

**Table S3.**  $E_T(30)$  and  $SA$  values used for calculating  $SdP_{cal}$  *via* eq. 9 (main text) and  $V_m$  and  $N$  of the respective IL.

| IL                                                  | $E_T(30)$          | $SA^1$             | $SdP_{cal}$ | $V_m$ (cm <sup>3</sup> /mol) <sup>18,19</sup> | $N$ (mol/cm <sup>3</sup> ) |
|-----------------------------------------------------|--------------------|--------------------|-------------|-----------------------------------------------|----------------------------|
| [C <sub>1</sub> mim]NTf <sub>2</sub>                | 52.6 <sup>6</sup>  | 0.279 <sup>a</sup> | 0.889       | 241.5                                         | 0.00414                    |
| [C <sub>2</sub> mim]N(CN) <sub>2</sub>              | 51.7 <sup>10</sup> | 0.279 <sup>a</sup> | 0.956       | 160.9                                         | 0.00622                    |
| [C <sub>2</sub> mim]FAP                             | 51.6 <sup>a</sup>  | 0.346 <sup>b</sup> | –           | –                                             | –                          |
| [C <sub>4</sub> mim]Cl                              | 51.0 <sup>3</sup>  | 0.167              | 1.165       | 161.7                                         | 0.00618                    |
| [C <sub>4</sub> mim]Ac                              | 48.8 <sup>4</sup>  | 0.191 <sup>a</sup> | 0.947       | 185.9                                         | 0.00538                    |
| [C <sub>4</sub> mim]MeSO <sub>3</sub>               | 49.6 <sup>4</sup>  | 0.191              | 1.005       | 188.4                                         | 0.00531                    |
| [C <sub>4</sub> mim]OctOSO <sub>3</sub>             | 51.9 <sup>5</sup>  | 0.223              | 1.104       | 326.8                                         | 0.00306                    |
| [C <sub>4</sub> mim]MeOSO <sub>3</sub>              | 51.4 <sup>4</sup>  | 0.208 <sup>a</sup> | 1.099       | 207.6                                         | 0.00482                    |
| [C <sub>4</sub> mim]CF <sub>3</sub> CO <sub>2</sub> | 51.1 <sup>6</sup>  | –                  | –           | –                                             | –                          |
| [C <sub>4</sub> mim]NO <sub>3</sub>                 | 51.8 <sup>7</sup>  | 0.215              | 1.109       | 174.5                                         | 0.00573                    |
| [C <sub>4</sub> mim]N(CN) <sub>2</sub>              | 51.5 <sup>4</sup>  | 0.238 <sup>a</sup> | 1.036       | 193.9                                         | 0.00516                    |
| [C <sub>4</sub> mim]CF <sub>3</sub> SO <sub>3</sub> | 52.1 <sup>4</sup>  | 0.271              | 1.004       | 211.7                                         | 0.00472                    |
| [C <sub>4</sub> mim]ClO <sub>4</sub>                | 52.9 <sup>8</sup>  | 0.271              | 1.063       | 190.5                                         | 0.00525                    |
| [C <sub>4</sub> mim]BF <sub>4</sub>                 | 52.4 <sup>6</sup>  | 0.288              | 0.988       | 188.1                                         | 0.00532                    |
| [C <sub>4</sub> mim]PF <sub>6</sub>                 | 52.6 <sup>9</sup>  | 0.296              | 0.984       | 208.3                                         | 0.0048                     |
| [C <sub>4</sub> mim]NTf <sub>2</sub>                | 51.7 <sup>6</sup>  | 0.304              | 0.899       | 291.8                                         | 0.00343                    |
| [C <sub>4</sub> mim]SbF <sub>6</sub>                | 52.1 <sup>9</sup>  | –                  | –           | –                                             | –                          |
| [C <sub>4</sub> mim]FAP                             | 51.5 <sup>a</sup>  | 0.329              | 0.827       | 358.4                                         | 0.00279                    |
| [C <sub>6</sub> mim]Cl                              | 50.2 <sup>5</sup>  | 0.159              | 1.119       | 194.9                                         | 0.00513                    |
| [C <sub>6</sub> mim]Br                              | 50.6 <sup>5</sup>  | 0.191              | 1.078       | 201.1                                         | 0.00497                    |
| [C <sub>6</sub> mim]N(CN) <sub>2</sub>              | 51.0 <sup>5</sup>  | 0.239              | 1.000       | 224.3                                         | 0.00446                    |
| [C <sub>6</sub> mim]CF <sub>3</sub> SO <sub>3</sub> | 52.7 <sup>11</sup> | 0.255              | 1.086       | 255.1                                         | 0.00392                    |
| [C <sub>6</sub> mim]BF <sub>4</sub>                 | 53.6 <sup>9</sup>  | 0.239              | 1.190       | 221.9                                         | 0.00451                    |
| [C <sub>6</sub> mim]PF <sub>6</sub>                 | 52.3 <sup>12</sup> | 0.279              | 1.000       | 241.5                                         | 0.00414                    |
| [C <sub>6</sub> mim]NTf <sub>2</sub>                | 51.7 <sup>6</sup>  | 0.279 <sup>a</sup> | 0.956       | 326.4                                         | 0.00306                    |
| [C <sub>8</sub> mim]Cl                              | 48.5 <sup>12</sup> | 0.159              | 1.001       | 228.4                                         | 0.00438                    |
| [C <sub>8</sub> mim]BF <sub>4</sub>                 | 51.9 <sup>5</sup>  | 0.247              | 1.039       | 254.2                                         | 0.00393                    |
| [C <sub>8</sub> mim]PF <sub>6</sub>                 | 50.1 <sup>12</sup> | 0.288              | 0.900       | 304.1                                         | 0.00329                    |

|                                                     |                    |       |       |       |         |
|-----------------------------------------------------|--------------------|-------|-------|-------|---------|
| [C <sub>8</sub> mim]NTf <sub>2</sub>                | 51.4 <sup>11</sup> | 0.263 | 0.943 | 360.1 | 0.00278 |
| [C <sub>10</sub> mim]NTf <sub>2</sub>               | 51.0 <sup>13</sup> | 0.263 | 0.943 | 395.2 | 0.00253 |
| [3C <sub>6</sub> C <sub>14</sub> P]NTf <sub>2</sub> | 46.4 <sup>14</sup> | 0.191 | 0.771 | 716.3 | 0.0014  |
| [C <sub>4</sub> mPip]NTf <sub>2</sub>               | 49.4 <sup>15</sup> | –     | –     | –     | –       |
| [C <sub>4</sub> Py]NTf <sub>2</sub>                 | 48.7 <sup>17</sup> | 0.279 | 0.737 | 287.7 | 0.00348 |
| [C <sub>6</sub> Py]NTf <sub>2</sub>                 | 50.1 <sup>16</sup> | 0.271 | 0.858 | 318.8 | 0.00314 |
| [C <sub>4</sub> dmim]BF <sub>4</sub>                | 49.7 <sup>9</sup>  | 0.215 | –     | –     | –       |
| [C <sub>4</sub> dmim]NTf <sub>2</sub>               | 50.1 <sup>6</sup>  | 0.239 | –     | –     | –       |
| [3C <sub>8</sub> mN]NTf <sub>2</sub>                | 46.2 <sup>14</sup> | 0.207 | 0.720 | 599.5 | 0.00167 |

<sup>a</sup> SA values were calculated from the  $\tilde{v}_{\max}$  values from ref. 2 using eq. 23 from the main text.

<sup>b</sup> Data was determined experimentally.

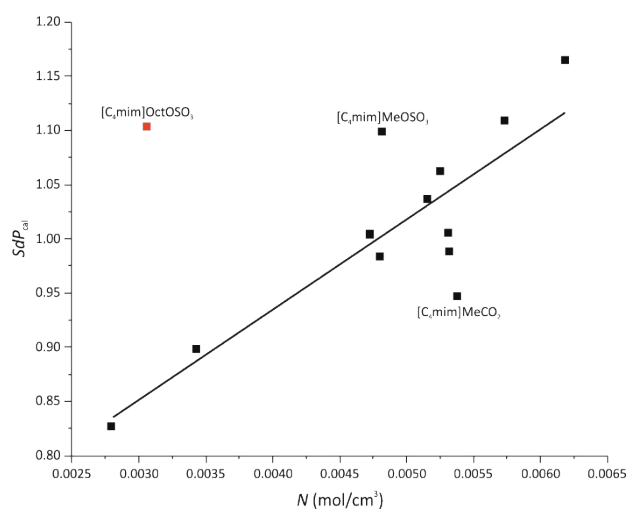

**Figure S16.**  $SdP$  calculated *via* eq. 9 of  $[C_4mim]$  ILs as function of the molar concentration  $N$  of the IL (data are taken from Table S3).

$$SdP_{cal} = 71.465 N + 0.658 \quad (S2)$$

$$n = 12, r = 0.815, f = 7.54 \cdot 10^{-4}$$

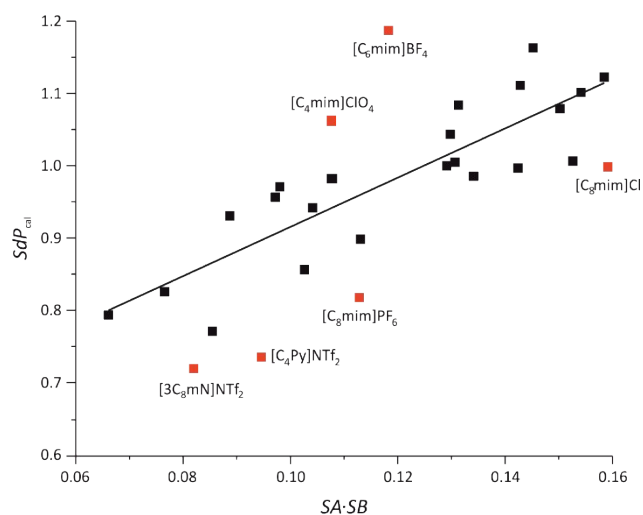

**Figure S17.** Correlation of  $SdP$  of ILs as function of the product  $SA \cdot SB$ . Long alkyl chain IL are marked.

#### 4. Correlation of $E_T(30)$ and SA with molar concentration of the IL

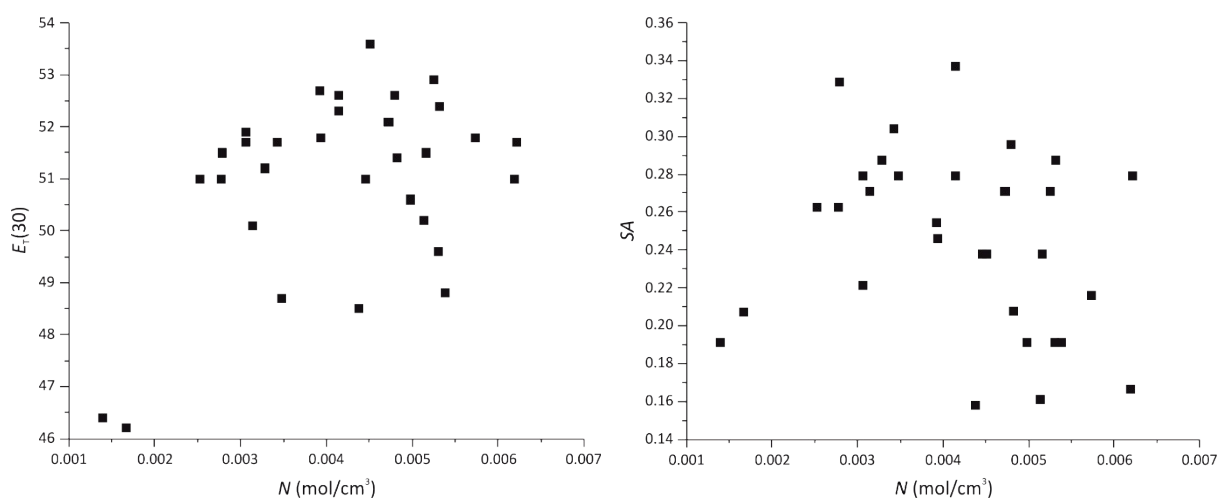

**Figure S18.** Left:  $E_T(30)$  values of all IL from Table S3 as function of  $N$ , Right: SA values of all IL in Table S3 as function of  $N$ .

#### References of the SI part

- 1 A. Schade, N. Behme and S. Spange, *Chem. Eur. J.*, 2014, **20**, 2232–2243.
- 2 S. Spange, R. Lungwitz and A. Schade, *J. Mol. Liq.*, 2014, **192**, 137–143.
- 3 H. Ohno and Y. Fukaya, *Chem. Lett.*, 2008, **38**, 2–7.
- 4 M. A. A. Rani, A. Brant, L. Crowhurst, A. Dolan, M. Lui, N. H. Hassan, J. P. Hallett, P. A. Hunt, H. Niedermeyer, J. M. Perez-Arlandis, M. Schrems, T. Welton and R. Wilding, *Phys. Chem. Chem. Phys.*, 2011, **13**, 16831–16840.
- 5 A. Jeličić, N. García, H.-G. Löhmansröben and S. Beuermann, *Macromol.*, 2009, **42**, 8801–8808.
- 6 H. Tokuda, S. Tsuzuki, Md. A. B. H. Susan, K. Hayamizu and M. Watanabe, *J. Phys. Chem. B*, 2006, **110**, 19593–19600.
- 7 J. L. Kaar, A. M. Jesionowski, J. A. Berberich, R. Moulton and A. J. Russell, *J. Am. Chem. Soc.*, 2003, **125**, 4125–4131.
- 8 J. D. Holbrey, R. D. Rogers, R. A. Mantz, P. C. Trulove, V. A. Cocalia, A. E. Visser, J. L. Anderson, J. L. Anthony, J. F. Brennecke, E. J. Maginn, T. Welton and R. A. Mantz, in *Ionic Liquids in Synthesis*, John Wiley & Sons, Ltd, 2008, pp. 57–174.
- 9 L. Crowhurst, P. R. Mawdsley, J. M. Perez-Arlandis, P. A. Salter and T. Welton, *Phys. Chem. Chem. Phys.*, 2003, **5**, 2790–2794.
- 10 S. Zhang, X. Qi, X. Ma, L. Lu and Y. Deng, *J. Phys. Chem. B*, 2010, **114**, 3912–3920.
- 11 B. R. Mellein, S. N. V. K. Aki, R. L. Ladewski and J. F. Brennecke, *J. Phys. Chem. B*, 2007, **111**, 131–138.
- 12 J. G. Huddleston, G. A. Broker, H. D. Willauer and R. D. Rogers, in *Ionic Liquids*, American Chemical Society, 2002, vol. 818, pp. 270–288.
- 13 S. V. Dzyuba and R. A. Bartsch, *Tetrahedron Lett.*, 2002, **43**, 4657–4659.
- 14 S. Coleman, R. Byrne, S. Minkovska and D. Diamond, *Phys. Chem. Chem. Phys.*, 2009, **11**, 5608–5614.
- 15 J.-M. Lee, *Chem. Eng. J.*, 2011, **172**, 1066–1071.
- 16 N. D. Khupse and A. Kumar, *J. Phys. Chem. B*, 2010, **114**, 376–381.
- 17 J.-M. Lee, S. Ruckes and J. M. Prausnitz, *J. Phys. Chem. B*, 2008, **112**, 1473–1476.
- 18 S. Zhang, N. Sun, X. He, X. Lu and X. Zhang, *J. Phys. Chem. Ref. Data*, 2006, **35**, 1475–1517.
- 19 Y. Marcus, *Ionic Liquid Properties: From Molten Salts to RTILs*, Springer International Publishing, 2016.
